# Supplementary material for: Parental Physical Illnesses and Their Association with Subsequent Externalizing and Internalizing Symptoms in Children
Source: Springer Nature journal article supplement (doi:10.1007/s10826-021-02079-y), 2021-08-28
Supplement: MOESM2 [file 19607156]

**Supplemental Table 1**

*Parental diagnoses of the members of the Northern Finland Birth Cohort 1986 during the study period 1994–2002*

| Parental diagnoses occurring between ages 8 and 16 years of cohort members (1994–2002) according to ICD9 (1994–1995) and ICD10 (1996–2002) | Either parent (maternal and/or paternal) | Maternal | Paternal |
| --- | --- | --- | --- |
|  | n (%) | n (%) | n (%) |
| Certain infectious and parasitic diseases (001–139, A00–B99) | 184 (2.6) | 84 (1.2) | 104 (1.5) |
| Neoplasms (140–239, C00–D48) | 385 (5.5) | 289 (4.1) | 102 (1.4) |
| Endocrine, nutritional and metabolic diseases (240–279, E00–E90) | 123 (1.7) | 72 (1.0) | 52 (0.7) |
| Diseases of the blood and blood-forming organs and certain disorders involving the immune mechanism (280–289, D50–D89) | 38 (0.5) | 24 (0.3) | 14 (0.2) |
| Mental and behavioural disorders (290–319, F00–F99) | 280 (4.0) | 126 (1.8) | 162 (2.3) |
| Diseases of the nervous system (320–389, G00–G99) | 605 (8.6) | 333 (4.7) | 291 (4.1) |
| Diseases of the circulatory system (390–459, I00–I99) | 1608 (22.9) | 1080 (15.3) | 658 (9.4) |
| Diseases of the respiratory system (460–519, J00–J99) | 487 (6.9) | 278 (4.0) | 224 (3.2) |
| Diseases of the digestive system (520–579, K00–K93) | 730 (10.4) | 344 (4.9) | 411 (5.8) |
| Diseases of the genitourinary system (580–629, N00–N99) | 764 (10.9) | 666 (9.5) | 115 (1.6) |
| Diseases of the skin and subcutaneous tissue (680–709, L00–L99) | 97 (1.4) | 48 (0.7) | 50 (0.7) |
| Diseases of the musculoskeletal system and connective tissue (710–739; M00–M99) | 1150 (16.3) | 622 (8.8) | 608 (8.6) |
| Symptoms, signs and abnormal clinical and laboratory findings, not elsewhere classified (780–799, R00–R99) | 677 (9.6) | 384 (5.5) | 320 (4.5) |
| Injury, poisoning and certain other consequences of external causes (800–999, S00-S99, T00–T98) | 800 (11.4) | 308 (4.4) | 515 (7.3) |
| External causes of morbidity and mortality (E-class, V01–V99, W00–W99, X00–X99, Y00–Y98) | 156 (2.3) | 140 (2.0) | 19 (0.3) |
| Factors influencing health status and contact with health services (V-class; Z00–Z99) | 841 (12.0) | 743 (10.6) | 112 (1.6) |

Abbreviation: ICD, International Classification of Diseases, Ninth and Tenth Revision

Northern Finland Birth Cohort members n= 7037
