# Supplementary material for: Parental Physical Illnesses and Their Association with Subsequent Externalizing and Internalizing Symptoms in Children
Source: Springer Nature journal article supplement (doi:10.1007/s10826-021-02079-y), 2021-08-28
Supplement: MOESM3 [file 19607156]

**Supplemental Table 2**

*Association between maternal illness and Youth Self-Report scores of male cohort members in the Northern Finland Birth Cohort 1986*

| Assessment | Parental somatic illness occurring between ages 8 and 16 years of cohort members | Maternal illness | | | |  |  |  |  |  |
| --- | --- | --- | --- | --- | --- | --- | --- | --- | --- | --- |
|  |  | Yes | | No | |  |  |  |  |  |
|  |  | n | YSR  mean (SD) | n | YSR  mean (SD) | p-value | Cohen’s d | p-valuea | p-valueb | B-Hpc |
| YSR tot | Certain infectious and parasitic diseases | 37 | 23.2 (15.7) | 3345 | 21.8 (13.8) | 0.541 |  | 0.608 | 0.697 |  |
|  | Neoplasms | 158 | 22.3 (13.2) | 3224 | 21.8 (13.8) | 0.648 |  | 0.650 | 0.543 |  |
|  | Endocrine, nutritional and metabolic diseases | 36 | 17.1 (9.5) | 3346 | 21.9 (13.8) | 0.005 | -0.35 | 0.032 | 0.019 | 0.04 |
|  | Diseases of the blood and blood-forming organs and certain disorders involving the immune mechanism | 11 | 22.1 (15.2) | 3371 | 21.9 (13.8) | 0.955 |  | 0.858 | 0.945 |  |
|  | Mental and behavioral disorders | 59 | 26.6 (16.7) | 3323 | 21.8 (13.7) | 0.008 | 0.35 | 0.007 | 0.005 | 0.032 |
|  | Diseases of the nervous system | 162 | 21.0 (14.5) | 3220 | 21.9 (13.8) | 0.445 |  | 0.579 | 0.318 |  |
|  | Diseases of the circulatory system | 525 | 21.6 (14.0) | 2857 | 21.9 (13.8) | 0.711 |  | 0.928 | 0.924 |  |
|  | Diseases of the respiratory system | 127 | 19.5 (9.7) | 3255 | 21.9 (13.9) | 0.007 | -0.17 | 0.069 | 0.025 | 0.037 |
|  | Diseases of the digestive system | 154 | 21.1 (13.4) | 3228 | 21.9 (13.8) | 0.481 |  | 0.401 | 0.399 |  |
|  | Diseases of the genitourinary system | 330 | 21.8 (14.1) | 3052 | 21.9 (13.8) | 0.923 |  | 0.985 | 0.921 |  |
|  | Diseases of the skin and subcutaneous tissue | 27 | 26.0 (17.8) | 3355 | 21.8 (13.8) | 0.116 |  | 0.122 | 0.157 |  |
|  | Diseases of the musculoskeletal system and connective tissue | 293 | 23.4 (13.8) | 3089 | 21.7 (13.8) | 0.040 | 0.12 | 0.031 | 0.068 | 0.107 |
|  | Symptoms, signs and abnormal clinical and laboratory findings, not elsewhere classified | 191 | 22.6 (14.0) | 3191 | 21.8 (13.8) | 0.443 |  | 0.389 | 0.396 |  |
|  | Injury, poisoning and certain other consequences of external causes | 137 | 24.4 (15.4) | 3245 | 21.7 (13.7) | 0.029 | 0.20 | 0.018 | 0.040 | 0.093 |
|  | External causes of morbidity and mortality | 65 | 18.2 (9.1) | 3317 | 21.9 (13.9) | 0.002 | -0.27 | 0.043 | 0.047 | 0.032 |
|  | Factors influencing health status and contact with health services | 383 | 21.4 (13.7) | 2999 | 21.9 (13.8) | 0.539 |  | 0.725 | 0.531 |  |
| YSR int | Certain infectious and parasitic diseases | 37 | 6.3 (5.6) | 3338 | 6.4 (5.3) | 0.885 |  | 0.887 | 0.809 |  |
|  | Neoplasms | 158 | 6.3 (4.8) | 3217 | 6.4 (5.3) | 0.857 |  | 0.834 | 0.793 |  |
|  | Endocrine, nutritional and metabolic diseases | 36 | 5.2 (4.1) | 3339 | 6.4 (5.3) | 0.165 |  | 0.154 | 0.067 |  |
|  | Diseases of the blood and blood-forming organs and certain disorders involving the immune mechanism | 11 | 7.1 (6.1) | 3364 | 6.4 (5.3) | 0.661 |  | 0.620 | 0.740 |  |
|  | Mental and behavioral disorders | 59 | 8.1 (7.1) | 3316 | 6.4 (5.3) | 0.059 | 0.32 | 0.011 | 0.003 | 0.315 |
|  | Diseases of the nervous system | 160 | 6.3 (4.7) | 3215 | 6.4 (5.3) | 0.905 |  | 0.973 | 0.582 |  |
|  | Diseases of the circulatory system | 524 | 6.5 (5.1) | 2851 | 6.4 (5.3) | 0.525 |  | 0.266 | 0.424 |  |
|  | Diseases of the respiratory system | 127 | 5.5 (4.0) | 3248 | 6.4 (5.3) | 0.015 | -0.17 | 0.079 | 0.022 | 0.24 |
|  | Diseases of the digestive system | 153 | 6.0 (4.6) | 3222 | 6.4 (5.3) | 0.327 |  | 0.307 | 0.236 |  |
|  | Diseases of the genitourinary system | 329 | 6.4 (5.4) | 3046 | 6.4 (5.3) | 0.897 |  | 0.855 | 0.857 |  |
|  | Diseases of the skin and subcutaneous tissue | 27 | 7.9 (5.8) | 3348 | 6.4 (5.3) | 0.135 |  | 0.143 | 0.186 |  |
|  | Diseases of the musculoskeletal system and connective tissue | 290 | 6.7 (5.1) | 3085 | 6.3 (5.3) | 0.248 |  | 0.318 | 0.536 |  |
|  | Symptoms, signs and abnormal clinical and laboratory findings, not elsewhere classified | 191 | 6.6 (5.4) | 3184 | 6.4 (5.3) | 0.548 |  | 0.515 | 0.720 |  |
|  | Injury, poisoning and certain other consequences of external causes | 137 | 7.1 (5.9) | 3238 | 6.4 (5.3) | 0.091 |  | 0.074 | 0.159 |  |
|  | External causes of morbidity and mortality | 65 | 5.4 (4.1) | 3310 | 6.4 (5.3) | 0.051 |  | 0.128 | 0.124 | 0.408 |
|  | Factors influencing health status and contact with health services | 383 | 6.3 (5.2) | 2992 | 6.4 (5.3) | 0.614 |  | 0.562 | 0.442 |  |
| YSR ext | Certain infectious and parasitic diseases | 36 | 10.0 (5.7 ) | 3323 | 9.0 (6.2) | 0.370 |  | 0.532 | 0.814 |  |
|  | Neoplasms | 158 | 9.2 (5.5) | 3201 | 9.0 (6.2) | 0.747 |  | 0.762 | 0.592 |  |
|  | Endocrine, nutritional and metabolic diseases | 36 | 6.9 (4.5) | 3323 | 9.1 (6.2) | 0.037 | -0.36 | 0.029 | 0.032 | 0.118 |
|  | Diseases of the blood and blood-forming organs and certain disorders involving the immune mechanism | 11 | 8.0 (5.1) | 3348 | 9.0 (6.2) | 0.576 |  | 0.858 | 0.506 |  |
|  | Mental and behavioral disorders | 59 | 10.7 (7.1) | 3300 | 9.0 (6.1) | 0.036 | 0.28 | 0.035 | 0.027 | 0.144 |
|  | Diseases of the nervous system | 158 | 9.0 (6.6) | 3201 | 9.0 (6.1) | 0.880 |  | 0.960 | 0.754 |  |
|  | Diseases of the circulatory system | 522 | 8.8 (6.5) | 2837 | 9.1 (6.1) | 0.439 |  | 0.648 | 0.662 |  |
|  | Diseases of the respiratory system | 127 | 8.4 (4.7) | 3232 | 9.1 (6.2) | 0.116 |  | 0.240 | 0.114 |  |
|  | Diseases of the digestive system | 152 | 9.3 (6.6) | 3207 | 9.0 (6.1) | 0.597 |  | 0.738 | 0.688 |  |
|  | Diseases of the genitourinary system | 326 | 9.2 (6.5) | 3033 | 9.0 (6.1) | 0.714 |  | 0.651 | 0.780 |  |
|  | Diseases of the skin and subcutaneous tissue | 27 | 9.7 (7.6) | 3332 | 9.0 (6.2) | 0.555 |  | 0.583 | 0.683 |  |
|  | Diseases of the musculoskeletal system and connective tissue | 289 | 9.8 (6.3) | 3070 | 9.0 (6.2) | 0.033 | 0.13 | 0.017 | 0.024 | 0.176 |
|  | Symptoms, signs and abnormal clinical and laboratory findings, not elsewhere classified | 191 | 9.1 (6.0) | 3168 | 9.0 (6.2) | 0.843 |  | 0.788 | 0.641 |  |
|  | Injury, poisoning and certain other consequences of external causes | 136 | 10.2 (6.8) | 3223 | 9.0 (6.1) | 0.031 | 0.20 | 0.018 | 0.037 | 0.248 |
|  | External causes of morbidity and mortality | 65 | 7.6 (4.4) | 3294 | 9.1 (6.2) | 0.011 | -0.25 | 0.072 | 0.080 | 0.176 |
|  | Factors influencing health status and contact with health services | 379 | 9.2 (6.1) | 2980 | 9.0 (6.2) | 0.681 |  | 0.427 | 0.609 |  |

Abbreviation: SD, standard deviation; YSR, Youth Self-Report; tot, total scores; int, internalizing scores; ext, externalizing scores

a Adjusted for the score of Rutter Children’s Behavior Questionnaire scale B2

b Adjusted for all adjusting factors: socioeconomic status of either parent, score of Rutter Children’s Behavior Questionnaire scale B2, parental psychiatric diagnoses

c Benjamini-Hochberg corrected p-value
