# Supplementary material for: Parental Physical Illnesses and Their Association with Subsequent Externalizing and Internalizing Symptoms in Children
Source: Springer Nature journal article supplement (doi:10.1007/s10826-021-02079-y), 2021-08-28
Supplement: MOESM7 [file 19607156]

**Supplemental Table 6**

*Statistically significant associations between parental illness and YSR scores of male cohort members after weighting the data*

| Assessment | Parental somatic illness occurring between ages 8 and 16 years of cohort members | Parental illness | | | |  |  |  |  |
| --- | --- | --- | --- | --- | --- | --- | --- | --- | --- |
|  |  | Yes | | No | |  |  |  |  |
|  |  | n | YSR  mean (SD) | n | YSR  mean (SD) | p-value | Cohen’s d | p-valuea | B-Hpb |
|  | MOTHER |  |  |  |  |  |  |  |  |
| YSR tot | Endocrine, nutritional and metabolic diseases | 33 | 16.8 (9.9) | 3009 | 22.0 (13.8) | 0.032 | -0.37 | 0.019 | 0.171 |
|  | Diseases of the respiratory system | 108 | 19.2 (9.8) | 2933 | 22.0 (13.9) | 0.005 | -0.20 | 0.025 | 0.040 |
|  | Diseases of the musculoskeletal system and connective tissue | 263 | 23.6 (13.9) | 2779 | 21.8 (13.8) | 0.038 | 0.13 | 0.068 | 0.152 |
|  | Injury, poisoning and certain other consequences of external causes | 125 | 24.5 (15.8) | 2917 | 21.8 (13.7) | 0.032 | 0.20 | 0.040 | 0.171 |
|  | External causes of morbidity and mortality | 63 | 18.4 (9.1) | 2979 | 22.0 (13.9) | 0.003 | -0.26 | 0.047 | 0.048 |
| YSR int | Diseases of the respiratory system | 108 | 5.3 (3.8) | 2928 | 6.4 (5.4) | 0.004 | -0.21 | 0.022 | 0.064 |
| YSR ext | Endocrine, nutritional and metabolic diseases | 33 | 7.0 (4.6) | 2991 | 9.1 (6.2) | 0.051 | - | - | - |
|  | Diseases of the musculoskeletal system and connective tissue | 259 | 9.9 (6.5) | 2765 | 9.0 (6.2) | 0.021 | 0.14 | 0.024 | 0.168 |
|  | Injury, poisoning and certain other consequences of external causes | 124 | 10.2 (7.0) | 2900 | 9.0 (6.2) | 0.031 | 0.19 | 0.037 | 0.165 |
|  | External causes of morbidity and mortality | 63 | 7.7 (4.5) | 2961 | 9.1 (6.2) | 0.017 | -0.23 | 0.080 | 0.272 |
|  | FATHER |  |  |  |  |  |  |  |  |
| YSR tot | Neoplasms | 46 | 18.4 (12.2) | 2996 | 22.0 (13.8) | 0.080 | - | - | - |
| YSR int | Neoplasms | 46 | 4.7 (4.1) | 2990 | 6.4 (5.3) | 0.024 | -0.26 | 0.033 | 0.192 |
|  | External causes of morbidity and mortality | 9 | 3.8 (2.5) | 3027 | 6.4 (5.3) | 0.015 | -0.49 | 0.136 | 0.240 |
| YSR ext | No significant associations |  |  |  |  |  |  |  |  |

Abbreviation: SD, standard deviation; YSR, Youth Self-Report; tot, total scores; int, internalizing scores; ext, externalizing scores

a Adjusted for all adjusting factors: socioeconomic status of either parent, score of Rutter Children’s Behavior Questionnaire scale B2, parental psychiatric diagnoses

b Benjamini-Hochberg corrected p-value
