# Supplementary material for: Parental Physical Illnesses and Their Association with Subsequent Externalizing and Internalizing Symptoms in Children
Source: Springer Nature journal article supplement (doi:10.1007/s10826-021-02079-y), 2021-08-28
Supplement: MOESM8 [file 19607156]

**Supplemental Table 7**

*Statistically significant associations between parental illness and YSR scores of female cohort members after weighting the data*

| Assessment | Parental somatic illness occurring between ages 8 and 16 years of cohort members | Parental illness | | | |  |  |  |  |
| --- | --- | --- | --- | --- | --- | --- | --- | --- | --- |
|  |  | Yes | | No | |  |  |  |  |
|  |  | n | YSR  mean (SD) | n | YSR  mean (SD) | p-value | Cohen’s d | p-valuea | B-Hpb |
|  | MOTHER |  |  |  |  |  |  |  |  |
| YSR tot | Injury, poisoning and certain other consequences of external causes | 147 | 35.6 (20.8) | 3092 | 31.4 (16.9) | 0.019 | 0.25 | 0.003 | 0.304 |
| YSR int | Endocrine, nutritional and metabolic diseases | 34 | 14.3 (6.5) | 3202 | 11.6 (7.3) | 0.035 | 0.37 | 0.036 | 0.187 |
|  | Diseases of the digestive system | 168 | 13.0 (7.5) | 3068 | 11.6 (7.3) | 0.014 | 0.19 | 0.016 | 0.224 |
|  | Injury, poisoning and certain other consequences of external causes | 147 | 13.1 (8.1) | 3089 | 11.6 (7.3) | 0.030 | 0.20 | 0.016 | 0.240 |
| YSR ext | Diseases of the circulatory system | 489 | 10.2 (6.7) | 2740 | 10.9 (6.7) | 0.047 | -0.10 | 0.042 | 0.376 |
|  | Injury, poisoning and certain other consequences of external causes | 145 | 12.1 (8.3) | 3084 | 10.7 (6.6) | 0.041 | 0.21 | 0.009 | 0.656 |
|  | FATHER |  |  |  |  |  |  |  |  |
| YSR tot | Certain infectious and parasitic diseases | 51 | 26.8 (15.4) | 3188 | 31.7 (17.1) | 0.042 | -0.28 | 0.021 | 0.672 |

Abbreviation: SD, standard deviation; YSR, Youth Self-Report; tot, total scores; int, internalizing scores; ext, externalizing scores

a Adjusted for all adjusting factors: socioeconomic status of either parent, score of Rutter Children’s Behavior Questionnaire scale B2, parental psychiatric diagnoses

b Benjamini-Hochberg corrected p-value
